# Supplementary material for: Downregulation of MMP-9 Enhances the Anti-Migratory Effect of Cyclophosphamide in MDA-MB-231 and MCF-7 Breast Cancer Cell Lines
Source: MDPI journal article supplement (doi:10.3390/ijms222312783), 2021-11-26
Supplement: s1 [file s1]

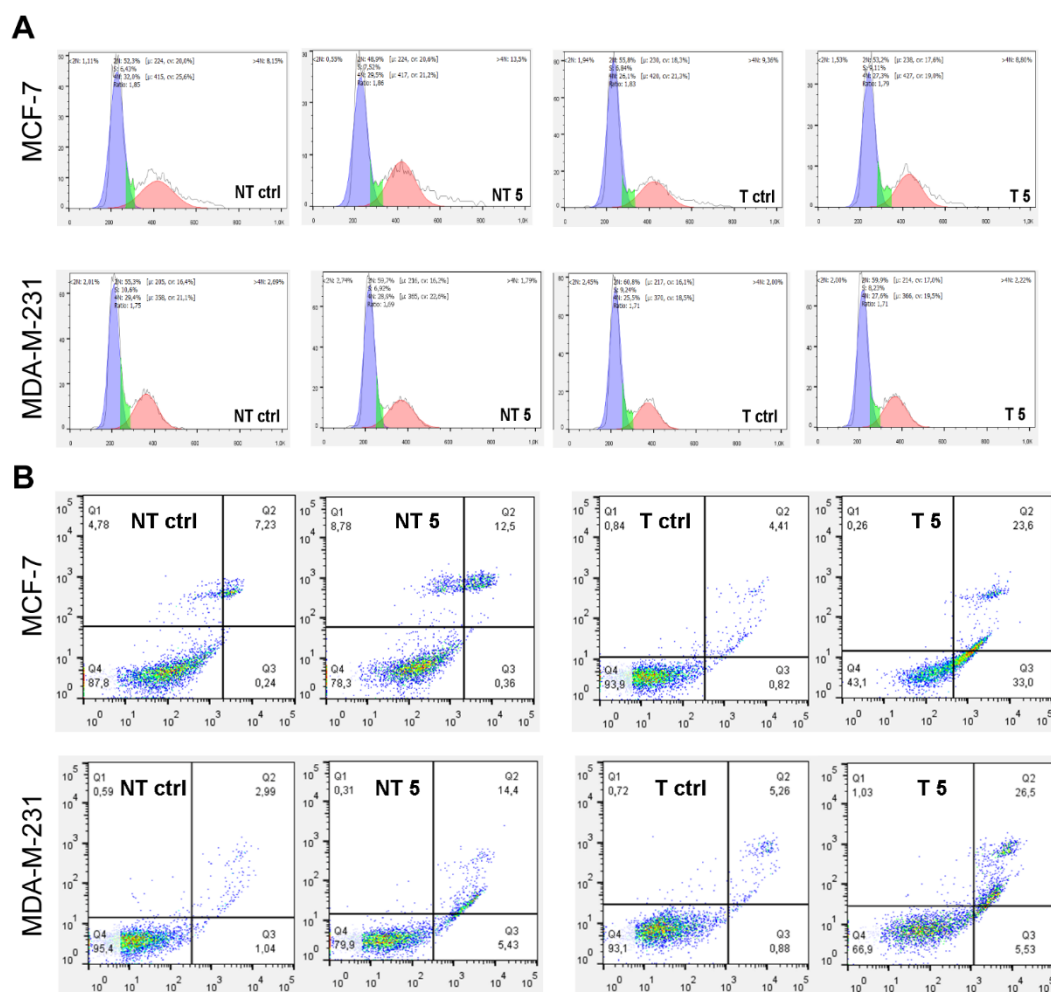

**Figure S1.** (A) The representative plots of PI staining for the cell cycle analysis. (B) The representative plots of Annexin V/PI staining for the apoptosis analysis. .
